# Supplementary material
Source: publisher site journal article supplement (https://www.dovepress.com/get_supplementary_file.php?f=224224.docx)
Supplement: Supplementary file 1 [file get_supplementary_file.php]

**The protection motivation theory (PMT) Scale for fall behaviors**

**Perceived sensitivity**

Dear Participant, the following statements are related to your perception of the falls risk. Please read the following statements carefully and determine to what extent you agree or disagree with them.

1. I may fall in the future too.

Strongly agree□ Agree□ No idea□ Disagree□ Strongly disagree□

2. Fall is not common and it may not happen to me.

Strongly agree□ Agree□ No idea□ Disagree□ Strongly disagree□

3. The likelihood of my fall is much higher than my peers.

Strongly agree□ Agree□ No idea□ Disagree□ Strongly disagree□

**Perceived severity**

Dear Participant, the following statements are related to your perception of the consequences of falls. Please read the following statements carefully and choose the one that suits your opinion.

1- If I fall, I have to stay in the hospital longer.

Strongly agree□ Agree□ No idea□ Disagree□ Strongly disagree□

2- If I fall, I will have fractures and injuries.

Strongly agree□ Agree□ No idea□ Disagree□ Strongly disagree□

3. Fall will cause me to become depressed and anxious.

Strongly agree□ Agree□ No idea□ Disagree□ Strongly disagree□

4. Fall makes me dependent on others in doing the daily affairs.

Strongly agree□ Agree□ No idea□ Disagree□ Strongly disagree□

5. If I fall, I have to develop a lot of pain.

Strongly agree□ Agree□ No idea□ Disagree□ Strongly disagree□

6. Fall makes my family suffer a lot.

Strongly agree□ Agree□ No idea□ Disagree□ Strongly disagree□

**Fear**

Think about the following questions and choose the best answer.

1- When I think about fall, I get anxious.

Not at all□ A little□ Somehow□ Much□ Too much□

2. Thinking of the fall scares me.

Not at all□ A little□ Somehow□ Much□ Too much□

3. When I think about fall, I feel sad.

Not at all□ A little□ Somehow□ Much□ Too much□

**Self-Efficacy**

Dear Participant, the following statements are on assuring of your ability to perform falling prevention behaviors. Please read the following statements carefully and choose the option that suits your opinion.

1- Even when I am in a hurry, I can do things with caution.

Strongly agree□ Agree□ No idea□ Disagree□ Strongly disagree□

2- I can use stick or auxiliary equipment when necessary, even if I seem unable.

Strongly agree□ Agree□ No idea□ Disagree□ Strongly disagree□

3. I can prevent falling by doing preventive behaviors.

Strongly agree□ Agree□ No idea□ Disagree□ Strongly disagree□

4. I can avoid going out on stormy, rainy, frosty or busy days even if necessary.

Strongly agree□ Agree□ No idea□ Disagree□ Strongly disagree□

5. I can ask my doctor about the side effects of my medication even if my doctor has a limited time for my visit.

Strongly agree□ Agree□ No idea□ Disagree□ Strongly disagree□

**Perceived costs**

Think about the questions below and choose the option that suits your opinion.

1- Fall prevention tools are not available to me.

Not at all□ A little□ Somehow□ Much□ Too much□

2 - Fall prevention facilities and equipment are expensive.

Not at all□ A little□ Somehow□ Much□ Too much□

3. I do not know how to prevent fall.

Not at all□ A little□ Somehow□ Much□ Too much□

4. I'm ashamed to use auxiliary equipment like a stick.

Not at all□ A little□ Somehow□ Much□ Too much□

5. It is unpleasant for me to get help from others when necessary.

Not at all□ A little□ Somehow□ Much□ Too much□

**Perceived response efficacy**

Dear Participant, the following statements relate to your view of activities that are effective in preventing falls. Please read the following statements carefully and choose the option that suits your opinion.

1- I can prevent falls by being cautious in my daily routine.

Strongly agree□ Agree□ No idea□ Disagree□ Strongly disagree□

2. Doing changes in the home such as changing lamps can prevent falls.

Strongly agree□ Agree□ No idea□ Disagree□ Strongly disagree□

3. Considering the possible dangers of getting things done, falls can be prevented.

Strongly agree□ Agree□ No idea□ Disagree□ Strongly disagree□

4. Falls can be prevented by using sticks or aiding devices when necessary.

Strongly agree□ Agree□ No idea□ Disagree□ Strongly disagree□

5. Avoiding going out on stormy, rainy, frosty or busy days, falls can be prevented.

Strongly agree□ Agree□ No idea□ Disagree□ Strongly disagree□

6. Asking the doctor about the side effects of my medication can help prevent falls.

Strongly agree□ Agree□ No idea□ Disagree□ Strongly disagree□

**Perceived reward**

Read the following statements and determine to what extent you agree or disagree with them.

1- It's fun for me to get things done quickly.

Strongly agree□ Agree□ No idea□ Disagree□ Strongly disagree□

2- I would like to be independent in doingsomething.

Strongly agree□ Agree□ No idea□ Disagree□ Strongly disagree□

**Perceived protection motivation**

Think about the following questions and give the best answer.

1- I plan to be more cautious in doing things from now on.

Not at all□ A little□ Somehow□ Much□ Too much□

2. I plan to make some changes at home to prevent falls.

Not at all□ A little□ Somehow□ Much□ Too much□

3. I plan to avoid going out on stormy, rainy, frosty or busy days.

Not at all□ A little□ Somehow□ Much□ Too much□

4 - I decide to ask my doctor about the side effects of my medication to prevent falls.

Not at all□ A little□ Somehow□ Much□ Too much□

5. I plan to use stick or aiding equipment when necessary.

Not at all□ A little□ Somehow□ Much□ Too much□
